# Supplementary material
Source: PubMed Central journal article supplement (PMC6322541)

## Supplemental Information

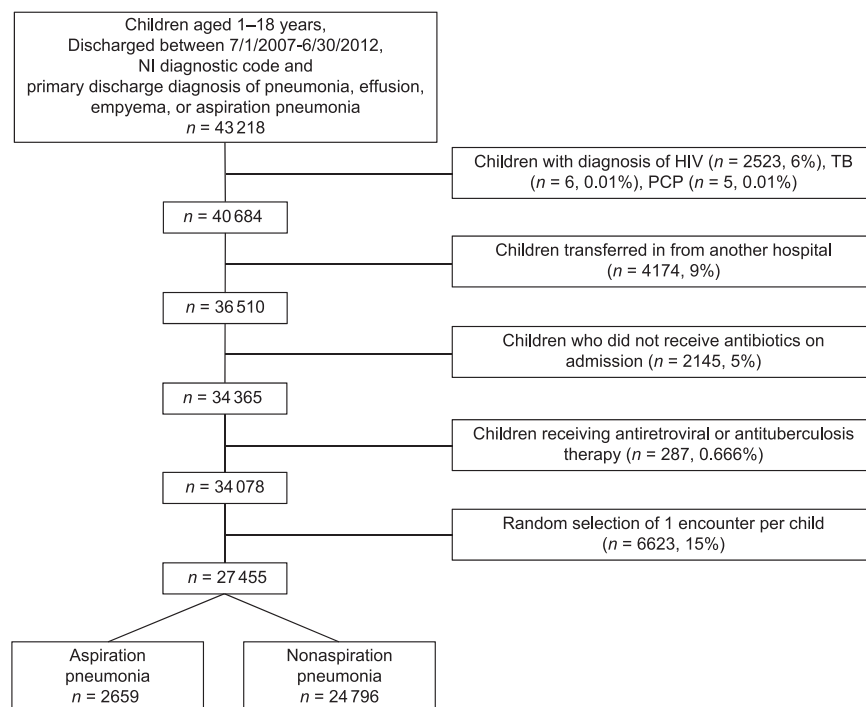

**SUPPLEMENTAL FIGURE 2**  
Cohort Diagram.

Supplement: NIHMS999920-supplement-Supplemental.pdf [file NIHMS999920-supplement-Supplemental.pdf]
